# Supplementary material
Source: publisher figshare collection journal article supplement (https://diabetesjournals.figshare.com/ndownloader/files/22450013)
Supplement: Supplementary file 1 [file 22450013]

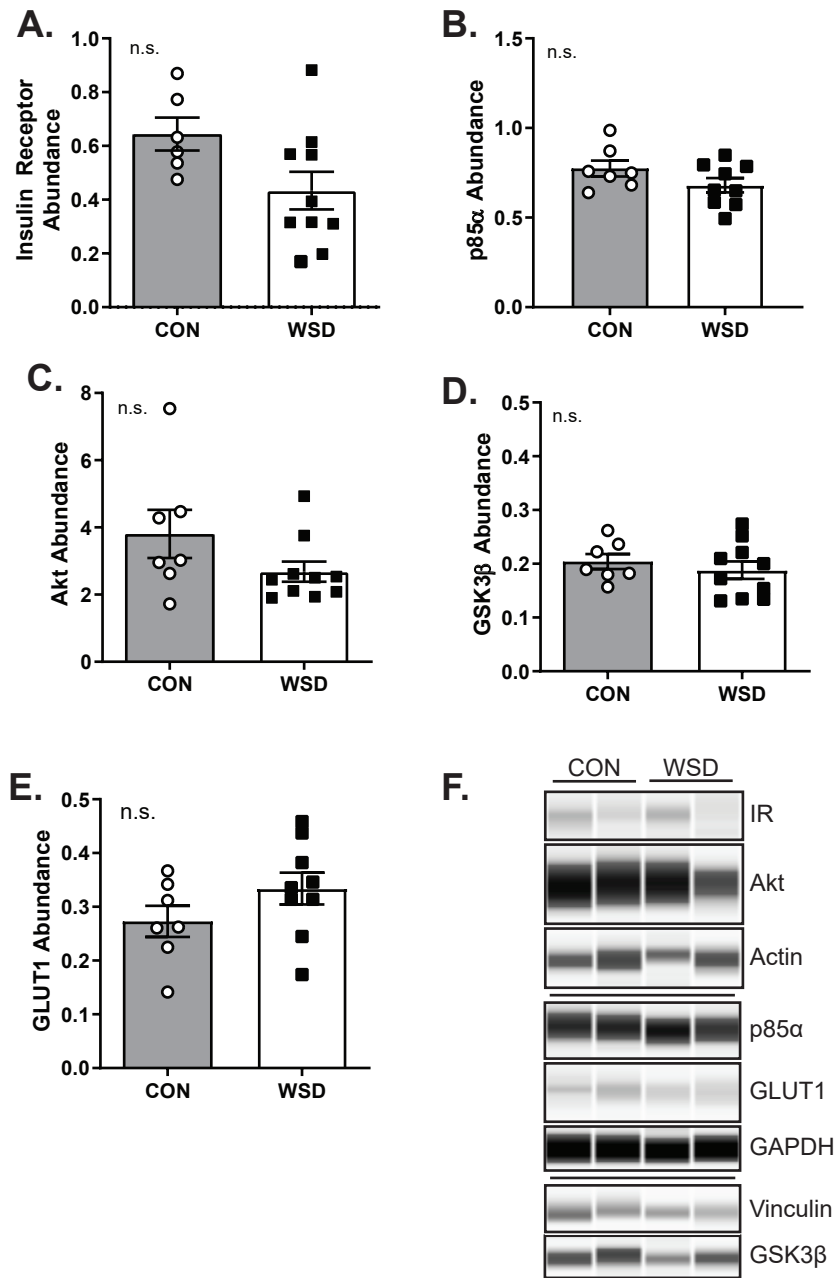

**Supplementary Figure 1:** Fetal Skeletal Muscle Insulin Signaling. Total abundance of components of the insulin signaling pathway measured by simple western in homogenates of fetal soleus muscle. (A) Insulin receptor abundance as a ratio to the control protein Actin. (B) p85 $\alpha$  abundance as a ratio to the control protein GAPDH. (C) Akt abundance relative to the control protein Actin. (D) GSK3 $\beta$  abundance relative to the control protein Vinculin. (E) GLUT1 abundance relative to the control protein GAPDH. (F) Example simple western probing of each of the above proteins. Data is expressed as mean  $\pm$  SEM, with individual data points shown, and analyzed by unpaired T test (n=6-10 per group).

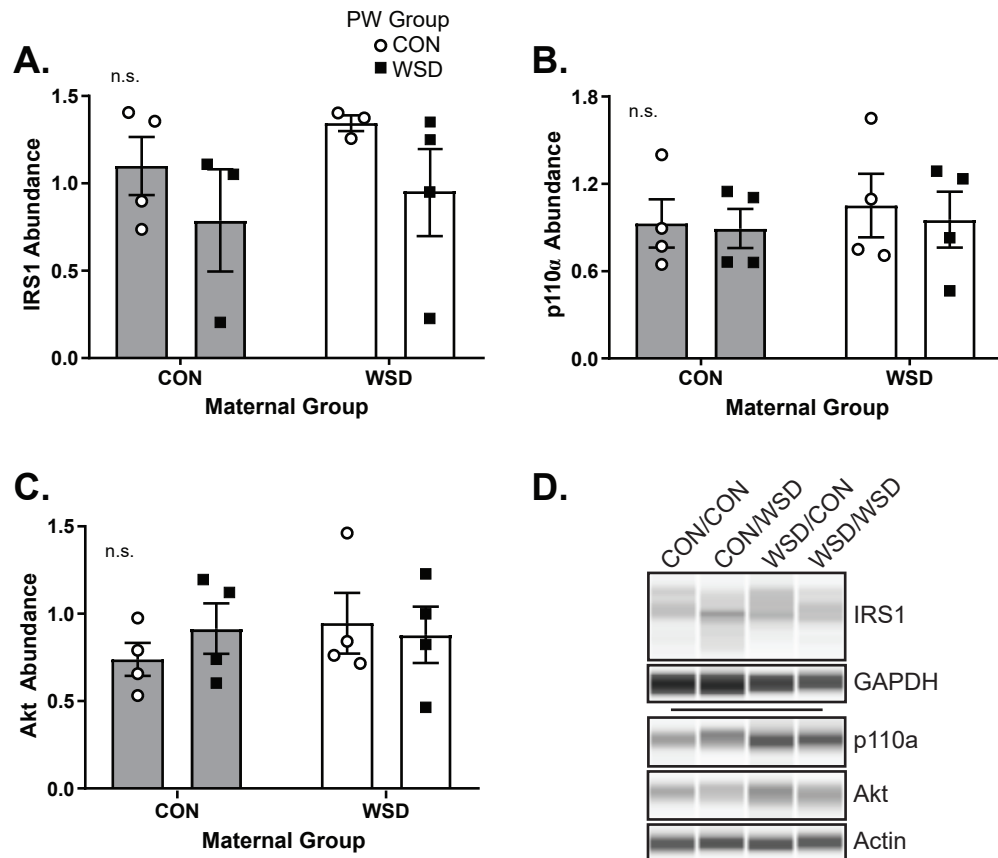

**Supplementary Figure 2: Juvenile Skeletal Muscle Ex Vivo Insulin Response.** Total abundance of proteins in the insulin signaling cascade were measured in basal skeletal muscle homogenates measured by simple western. (A) IRS1 abundance is expressed relative to GAPDH. (B) p110 $\alpha$  abundance is expressed relative to Actin. (C) Akt abundance is expressed relative to Actin. (D) Example simple western probing of IRS1, p110 $\alpha$ , Akt, GAPDH, and Actin. Data is expressed as the mean  $\pm$  SEM, with individual data points shown, and analyzed by two-way ANOVA with Tukey multiple comparisons test (n=3-4 per group).

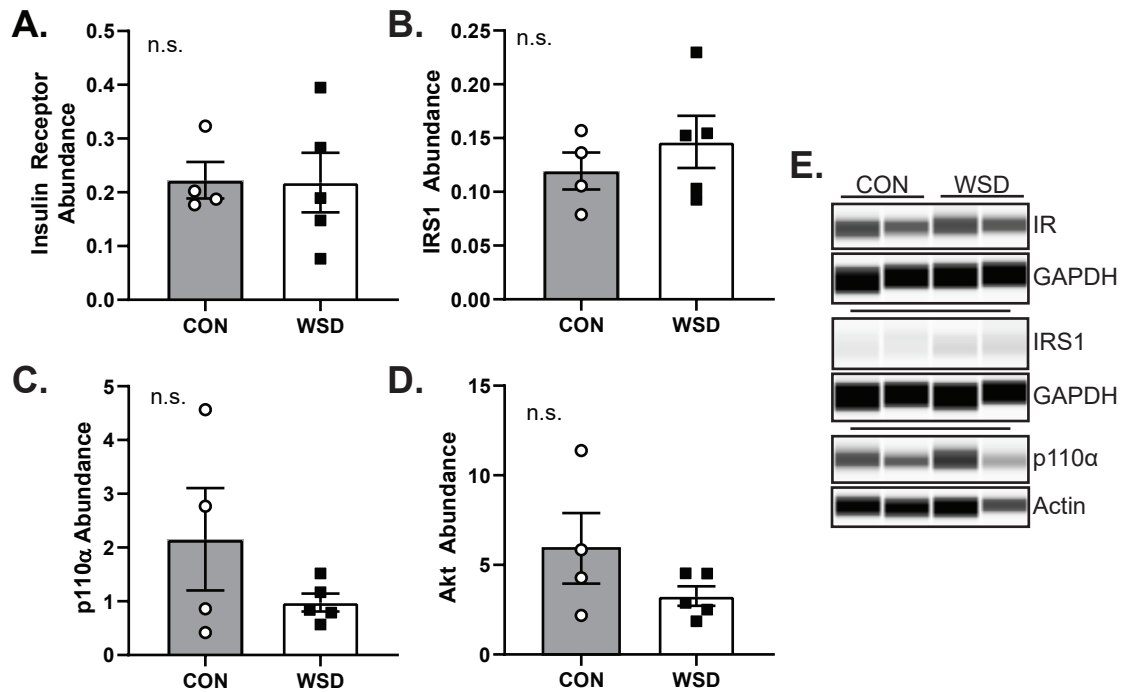

**Supplementary Figure 3: Juvenile Skeletal Muscle In Vivo Insulin Response.** Abundance of total proteins in the insulin signaling cascade were measured by simple western in homogenates of gastrocnemius biopsies from fasted seven-month-old animals. Insulin receptor (A), IRS1 (B), p110α (C), and Akt (D) abundance was expressed relative to either GAPDH or Actin. Data is expressed as the mean  $\pm$  SEM, with individual data points shown, and analyzed by unpaired T test (n=4-5 per group).

**Supplementary Table 1**

| Target             | Manufacturer              | Catalog Number | Dilution | Host Species | Immunogen Species | Supplier Reported Reactivity                                         |
|--------------------|---------------------------|----------------|----------|--------------|-------------------|----------------------------------------------------------------------|
| IRS1               | Cell Signaling Technology | 3407           | 1:25     | Rabbit       | Human             | Human, Mouse, Rat, Monkey                                            |
| p110 $\alpha$      | Cell Signaling Technology | 4249           | 1:50     | Rabbit       | Human             | Human, Mouse, Rat, Bovine                                            |
| IRS1 (pY896)       | Abcam                     | ab46800        | 1:25     | Rabbit       | Human             | Human                                                                |
| Akt (pT308)        | Cell Signaling Technology | 4056           | 1:50     | Rabbit       | Mouse             | Human, Mouse, Rat, Monkey                                            |
| Akt (pS473)        | Cell Signaling Technology | 4060           | 1:50     | Rabbit       | Human             | Human, Mouse, Rabbit, Hamster, Monkey, Drosophila, Zebrafish, Bovine |
| AS160 (pT642)      | Cell Signaling Technology | 4288           | 1:25     | Rabbit       | Human             | Human                                                                |
| GSK3 $\beta$ (pS9) | Cell Signaling Technology | 9323           | 1:100    | Rabbit       | Human             | Human, Mouse, Rabbit, Monkey                                         |
| Insulin Receptor   | Cell Signaling Technology | 3025           | 1:20     | Rabbit       | Human             | Human, Mouse Rat                                                     |
| p85 $\alpha$       | Cell Signaling Technology | 4257           | 1:25     | Rabbit       | Human             | Human, Mouse, Rabbit                                                 |
| Akt                | Cell Signaling Technology | 4691           | 1:1000   | Rabbit       | Mouse             | Human, Mouse, Rabbit, Monkey, Drosophila                             |
| GSK3 $\beta$       | Cell Signaling Technology | 9315           | 1:2000   | Rabbit       | Human             | Human, Mouse, Rabbit, Monkey                                         |
| GLUT1              | Cell Signaling Technology | 12939          | 1:25     | Rabbit       | Human             | Human, Mouse, Rat                                                    |
